# Supplementary material for: Oxygen vacancy induces self-doping effect and metalloid LSPR in non-stoichiometric tungsten suboxide synergistically contributing to the enhanced photoelectrocatalytic performance of WO3−x/TiO2−xheterojunction
Source: Royal Society of Chemistry journal article supplement (doi:10.1039/c8cp02044b), 2018-01-01
Supplement: c8cp02044b1.pdf [file c8cp02044b1.pdf]

## Supporting Information

### **Oxygen vacancy induced self-doping effect and metalloid LSPR in non-stoichiometric tungsten suboxide synergistically contributing to the enhanced photoelectrocatalytic performance of $\text{WO}_{3-x}/\text{TiO}_{2-x}$ heterojunction**

Weicheng Huang<sup>a</sup>, Jinxin Wang<sup>a</sup>, Lang Bian<sup>a</sup>, Chaoyue zhao<sup>b</sup>, Danqing Liu<sup>\*b</sup>,

Chongshen Guo<sup>\*c,d</sup>, Bin Yang<sup>\*a</sup>, Wenwu Cao<sup>a,e</sup>

<sup>a</sup> Condensed Matter Science and Technology Institute, Department of Physics, Harbin Institute of Technology, Harbin 150080, China.

<sup>b</sup> School of Chemical and Environmental Engineering, Harbin University of Science and Technology, Harbin 150040, China.

<sup>c</sup> School of Chemistry and Chemical Engineering, Harbin Institute of Technology, Harbin 150080, China.

<sup>d</sup> The Key Laboratory of Micro-systems and Micro-structures Manufacturing, (Ministry of Education), Academy of Fundamental and Interdisciplinary Sciences, Harbin Institute of Technology, Harbin 150080, China.

<sup>e</sup> Department of Mathematics and Materials Research Institute, The Pennsylvania State University, Pennsylvania 16802, USA

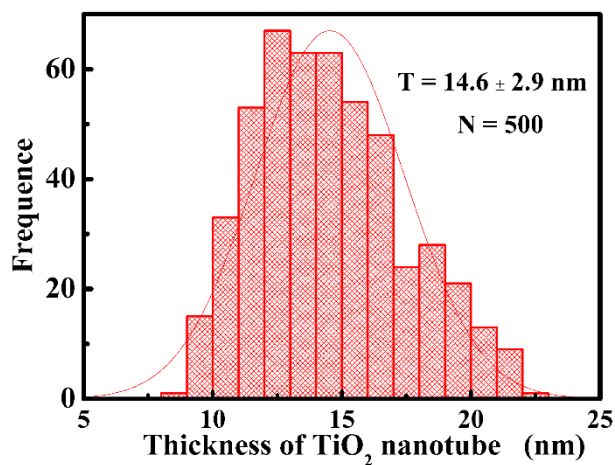

Figure S1 Thickness distribution of  $\text{TiO}_2$  nanotube wall

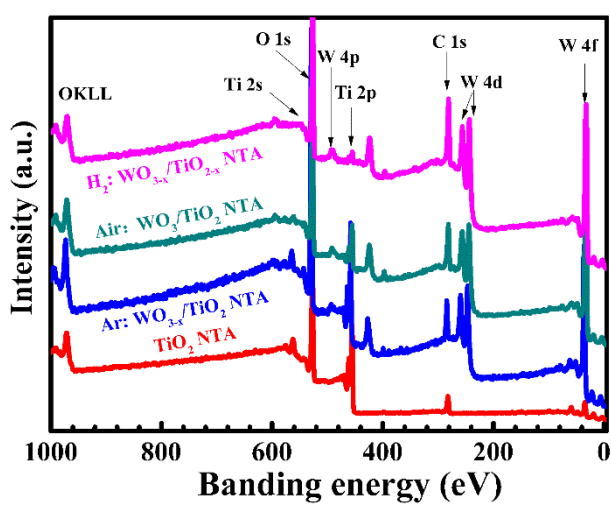

Figure S2 Full XPS spectra of samples.

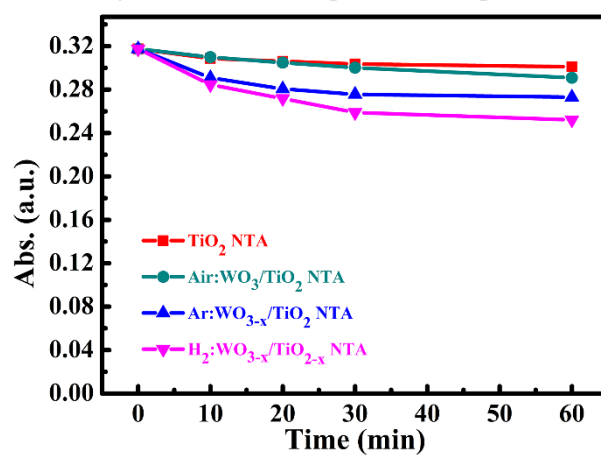

Figure S3 Dark reaction procedure before PEC degradation of MB.

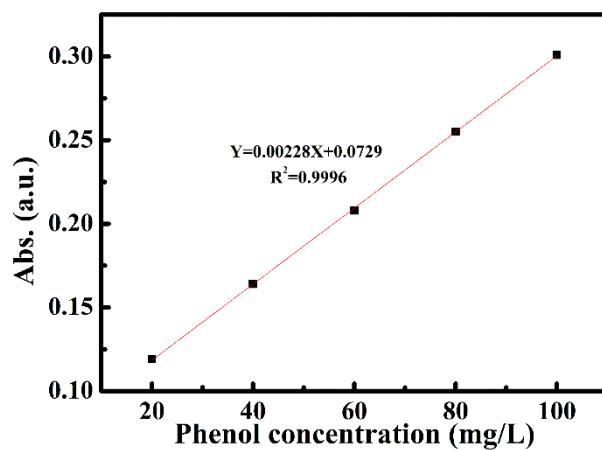

Figure S4 the light absorption (at 510 nm) of verity standard concentration of phenol solution.

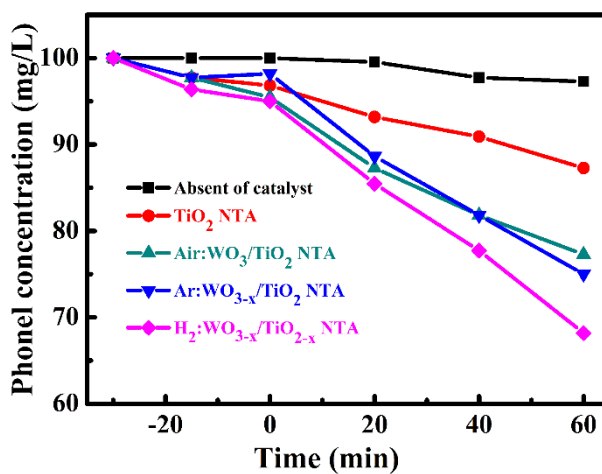

Figure S5 Phenol PEC degradation performance of samples
